# Supplementary material
Source: publisher figshare collection journal article supplement (https://sage.figshare.com/ndownloader/files/17536634)
Supplement: Supplementary file 1 [file 17536634]

## Supplementary Figure legends

**Supplemental Figure 1.** PSS attenuates liver injury in LPS induced septic mice. Mice were i.p. injected with PSS (50 mg/kg) or vehicle at 0 h (immediately) and 12 h after LPS (5 mg/kg) administration. (A) Hematoxylin and eosin (H&E)–stained liver sections from four groups (×200 magnification). (B) Serum ALT and AST levels were measured for hepatocellular injury. (C) *IL-6*, (D) *TNF- $\alpha$* , (E) *CXCL-1* and (F) *CXCL-2* mRNA levels were detected in the liver tissues from mice (sham or LPS, i. p., 24 h) with or without PSS treatment.

**Supplemental Figure 2.** PSS attenuates kidney injury in LPS induced septic mice. Mice were i. p. injected with PSS (50 mg/kg) or vehicle at 0 h (immediately) and 12 h after LPS (5 mg/kg) administration. (A) Hematoxylin and eosin (H&E)–stained kidney sections from four groups (×200 magnification). Serum levels of (B) BUN and (C) creatinine were detected from mice (sham or LPS, i. p., 24 h) with or without PSS treatment. (C) *IL-6*, (D) *TNF- $\alpha$* , (E) *CXCL-1* and (F) *CXCL-2* mRNA levels were detected in the kidney tissues from mice (sham or LPS, i. p., 24 h) with or without PSS treatment.\* $P < 0.05$  versus sham; # $P < 0.05$  versus LPS (DMSO). All the results are from at least three independent experiments; Data represent means  $\pm$  SD.

**Supplemental Figure 3.** PSS inhibits NF- $\kappa$ B signaling in the LPS-mediated MLE cells. MLE cells were used to incubate with PSS (10  $\mu$ M) for 1 h prior to 1 h of LPS (1  $\mu$ g/ml) stimulation. MLE cells were then harvested for Western blotting. (A) NF- $\kappa$ B signaling proteins, including p-IKK, IKK $\beta$ , p-P65, P65, p-I $\kappa$ B $\alpha$  and I $\kappa$ B $\alpha$  were detected in the MLE cells (Con or LPS groups) with or without PSS treatment. (B) The protein ratio of p-IKK with IKK $\beta$ , (C) the protein ratio of p-P65 with P65, and (D) the protein ratio of p-I $\kappa$ B $\alpha$  with I $\kappa$ B $\alpha$  were depicted with representative histograms. \* $P < 0.05$  versus Con; # $P < 0.05$  versus LPS (DMSO). All the results are from at least three independent experiments; Data represent means  $\pm$  SD.
